# Supplementary material
Source: PubMed Central journal article supplement (PMC7590972)
Supplement: jp0c00257_si_001.pdf [file jp0c00257_si_001.pdf]

## Supporting Information

### How Many Pnicogen Bonds can be Formed to a Central Atom Simultaneously?

Rafał Wysokiński,<sup>\*1</sup> Wiktor Zierkiewicz,<sup>1</sup> Mariusz Michalczyk,<sup>1</sup> and Steve Scheiner<sup>\*2</sup>

<sup>1</sup> Faculty of Chemistry, Wrocław University of Science and Technology, Wybrzeże Wyspiańskiego 27, 50-370 Wrocław, Poland

<sup>2</sup> Department of Chemistry and Biochemistry, Utah State University Logan, Utah 84322-0300, United States

\*Correspondence to: rafal.wysokinski@pwr.edu.pl, steve.scheiner@usu.edu

Table S1. Structural parameters in isolated ZF<sub>3</sub> (Z = P, As, Sb, Bi) calculated at the MP2/aug-cc-pVDZ level of theory.

|                  | R(Z-F), Å | Σθ(F-Z-F), degs |
|------------------|-----------|-----------------|
| PF <sub>3</sub>  | 1.630     | 291.2           |
| AsF <sub>3</sub> | 1.745     | 288.2           |
| SbF <sub>3</sub> | 1.918     | 284.5           |
| BiF <sub>3</sub> | 2.016     | 286.6           |

Table S2. Deformation energies (E<sub>def</sub>, kcal/mol) of ZF<sub>3</sub> complexes with HCN and CN anion calculated at the MP2/aug-cc-pVDZ level of theory.

|                                     | ZF <sub>3</sub>                    | base | total |
|-------------------------------------|------------------------------------|------|-------|
|                                     | HCN...ZF <sub>3</sub>              |      |       |
| HCN...PF <sub>3</sub>               | 0.08                               | 0.00 | 0.08  |
| HCN...AsF <sub>3</sub>              | 0.15                               | 0.01 | 0.16  |
| HCN...SbF <sub>3</sub>              | 0.26                               | 0.01 | 0.27  |
| HCN...BiF <sub>3</sub>              | 0.26                               | 0.02 | 0.28  |
|                                     | H <sub>3</sub> N...ZF <sub>3</sub> |      |       |
| H <sub>3</sub> N...PF <sub>3</sub>  | 0.41                               | 0.00 | 0.41  |
| H <sub>3</sub> N...AsF <sub>3</sub> | 0.92                               | 0.02 | 0.90  |
| H <sub>3</sub> N...SbF <sub>3</sub> | 1.36                               | 0.03 | 1.39  |
| H <sub>3</sub> N...BiF <sub>3</sub> | 1.09                               | 0.02 | 1.11  |
|                                     | NC...ZF <sub>3</sub>               |      |       |
| NC...PF <sub>3</sub>                | 54.68                              | 0.30 | 54.98 |
| NC...AsF <sub>3</sub>               | 46.59                              | 0.27 | 46.86 |
| NC...SbF <sub>3</sub>               | 35.83                              | 0.22 | 36.05 |
| NC...BiF <sub>3</sub>               | 33.74                              | 0.18 | 33.92 |

Table S3. AIM descriptors of the neutral and anionic complexes. Bond critical point (BCP) properties: electron density  $\rho$ , Laplacian of electron density  $\nabla^2\rho$ , ellipticity  $\varepsilon$ , and total electron energy  $H$ , were obtained at the MP2/ aug-cc-pVDZ level. Data in atomic units.

|                                            | interaction   | $\rho$ | $\nabla^2\rho$ | $\varepsilon$ | $H$     |
|--------------------------------------------|---------------|--------|----------------|---------------|---------|
| HCN $\cdots$ ZF <sub>3</sub>               |               |        |                |               |         |
| HCN $\cdots$ PF <sub>3</sub>               | N $\cdots$ P  | 0.012  | +0.033         | 0.041         | -0.001  |
| HCN $\cdots$ AsF <sub>3</sub>              | N $\cdots$ As | 0.016  | +0.042         | 0.035         | -0.0004 |
| HCN $\cdots$ SbF <sub>3</sub>              | N $\cdots$ Sb | 0.020  | +0.049         | 0.049         | 0.0003  |
| HCN $\cdots$ BiF <sub>3</sub>              | N $\cdots$ Bi | 0.022  | +0.062         | 0.040         | -0.0003 |
| H <sub>3</sub> N $\cdots$ ZF <sub>3</sub>  |               |        |                |               |         |
| H <sub>3</sub> N $\cdots$ PF <sub>3</sub>  | N $\cdots$ P  | 0.022  | +0.048         | 0.044         | -0.001  |
| H <sub>3</sub> N $\cdots$ AsF <sub>3</sub> | N $\cdots$ As | 0.033  | +0.062         | 0.050         | +0.003  |
| H <sub>3</sub> N $\cdots$ SbF <sub>3</sub> | N $\cdots$ Sb | 0.036  | +0.083         | 0.073         | +0.004  |
| H <sub>3</sub> N $\cdots$ BiF <sub>3</sub> | N $\cdots$ Bi | 0.033  | +0.095         | 0.041         | +0.001  |
| NC $\cdots$ ZF <sub>3</sub>                |               |        |                |               |         |
| NC $\cdots$ PF <sub>3</sub>                | N $\cdots$ P  | 0.131  | +0.143         | 0.097         | +0.099  |
| NC $\cdots$ AsF <sub>3</sub>               | N $\cdots$ As | 0.122  | +0.063         | 0.047         | +0.075  |
| NC $\cdots$ SbF <sub>3</sub>               | N $\cdots$ Sb | 0.090  | +0.180         | 0.040         | +0.031  |
| NC $\cdots$ BiF <sub>3</sub>               | N $\cdots$ Bi | 0.082  | +0.176         | 0.028         | +0.023  |

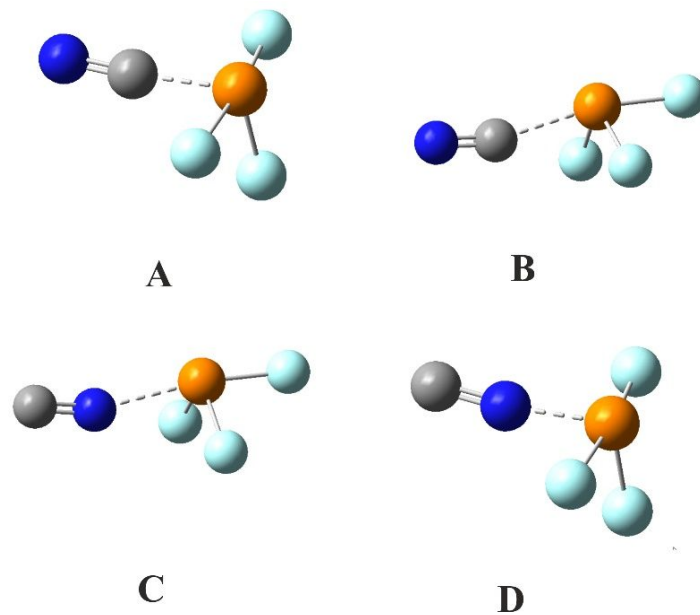

Fig S1. MP2/aug-cc-pVDZ optimized geometries of complexes of CN<sup>-</sup> anion with ZF<sub>3</sub>

Table S4. Electronic and Gibbs free energy differences ( $\Delta E_{\text{el}}$  and  $\Delta G^{\text{a}}$ , in kcal/mol) between indicated geometries and global minimum, calculated at the MP2/aug-cc-pVDZ.

|                                   | B           | C           | D             |
|-----------------------------------|-------------|-------------|---------------|
| NC <sup>-</sup> ⋯PF <sub>3</sub>  | 3.93 (3.09) | 5.82 (4.60) | 11.70 (11.45) |
| NC <sup>-</sup> ⋯AsF <sub>3</sub> | 3.79 (3.09) | 5.82 (4.84) | 10.73 (10.38) |
| NC <sup>-</sup> ⋯SbF <sub>3</sub> | 1.75 (1.31) | 3.75 (3.05) | 7.51 (7.18)   |
| NC <sup>-</sup> ⋯BiF <sub>3</sub> | 1.50 (0.97) | 2.30 (1.32) | 8.11 (6.88)   |

<sup>a</sup> Gibbs free energies in parentheses.

Table S5. Deformation energies ( $E_{\text{def}}$ , kcal/mol) of  $ZF_3$  complexes with  $CN^-$  anion calculated at the MP2/aug-cc-pVDZ level of theory.

|                  | $ZF_3$ | base | total |
|------------------|--------|------|-------|
| <b>B</b>         |        |      |       |
| $NC\cdots PF_3$  | 11.13  | 0.08 | 11.21 |
| $NC\cdots AsF_3$ | 9.55   | 0.09 | 9.64  |
| $NC\cdots SbF_3$ | 7.57   | 0.09 | 7.66  |
| $NC\cdots BiF_3$ | 5.82   | 0.06 | 5.88  |
| <b>C</b>         |        |      |       |
| $CN\cdots PF_3$  | 6.45   | 0.01 | 6.46  |
| $CN\cdots AsF_3$ | 6.36   | 0.02 | 6.38  |
| $CN\cdots SbF_3$ | 5.54   | 0.02 | 5.56  |
| $CN\cdots BiF_3$ | 4.43   | 0.01 | 4.44  |
| <b>D</b>         |        |      |       |
| $CN\cdots PF_3$  | 52.98  | 0.11 | 53.08 |
| $CN\cdots AsF_3$ | 45.23  | 0.08 | 45.32 |
| $CN\cdots SbF_3$ | 34.87  | 0.07 | 34.93 |
| $CN\cdots BiF_3$ | 33.39  | 0.06 | 33.45 |

Table S6.  $V_{s,\text{max}}$  of dimers calculated at the MP2/aug-cc-pVDZ level of theory.

| Dimer              | (Z-F) $\sigma$ -hole | $\pi$ -hole |
|--------------------|----------------------|-------------|
| $HCN\cdots ZF_3$   |                      |             |
| $HCN\cdots PF_3$   | 24.2                 | -1.7        |
| $HCN\cdots AsF_3$  | 30.9                 | -5.9        |
| $HCN\cdots SbF_3$  | 36.7                 | -5.4        |
| $HCN\cdots BiF_3$  | 47.9                 | -3.4        |
| $NH_3\cdots ZF_3$  |                      |             |
| $H_3N\cdots PF_3$  | 21.7                 | -4.4        |
| $H_3N\cdots AsF_3$ | 26.3                 | -11.1       |
| $H_3N\cdots SbF_3$ | 33.4                 | -10.0       |
| $H_3N\cdots BiF_3$ | 46.9                 | -6.6        |
| $NC\cdots ZF_3$    |                      |             |
| $CN\cdots PF_3$    | -81.1                | -86.5       |
| $CN\cdots AsF_3$   | -69.9                | -76.2       |
| $CN\cdots SbF_3$   | -59.1                | -64.5       |
| $CN\cdots BiF_3$   | -40.7                | -47.3       |

Table S7. Pairwise interaction energies, and energies of cooperativity ( $E_{\text{coop}}$ ) in  $ZF_3$  complexes with two HCN or  $CN^-$  bases calculated at the MP2/aug-cc-pVDZ level of theory.

|                         | $E_{\text{tot}}$ | E1     | E2     | E3    | $E_{\text{coop}}$ |
|-------------------------|------------------|--------|--------|-------|-------------------|
| $(HCN)_2 \cdots PF_3$   | -4.70            | -2.93  | -2.93  | 0.78  | 0.38              |
| $(HCN)_2 \cdots AsF_3$  | -7.51            | -4.48  | -4.49  | 0.83  | 0.63              |
| $(HCN)_2 \cdots SbF_3$  | -11.06           | -6.48  | -6.48  | 0.78  | 1.12              |
| $(HCN)_2 \cdots BiF_3$  | -14.57           | -8.16  | -8.12  | 0.80  | 0.91              |
|                         |                  |        |        |       |                   |
| $(H_3N)_2 \cdots PF_3$  | -8.66            | -5.23  | -5.22  | 1.02  | 0.77              |
| $(H_3N)_2 \cdots AsF_3$ | -14.88           | -8.85  | -8.85  | 1.21  | 1.61              |
| $(H_3N)_2 \cdots SbF_3$ | -23.28           | -13.71 | -13.72 | 1.15  | 3.00              |
| $(H_3N)_2 \cdots BiF_3$ | -27.45           | -15.25 | -15.22 | 1.07  | 1.95              |
|                         |                  |        |        |       |                   |
| $(CN^-)_2 \cdots SbF_3$ | -4.29            | -45.30 | -45.28 | 75.64 | 10.65             |
| $(CN^-)_2 \cdots BiF_3$ | -12.92           | -46.69 | -46.69 | 70.18 | 10.28             |

$E1=L_a-ZF_3$ ,  $E2=ZF_3-L_b$ ,  $E3=L_a-L_b$  where L refers to bases

Table S8. AIM descriptors of the neutral and anionic trimers. Bond critical point (BCP) properties: electron density  $\rho$ , Laplacian of electron density  $\nabla^2\rho$ , ellipticity  $\epsilon$ , and total electron energy H, were obtained at the MP2/ aug-cc-pVDZ level. Data in atomic units.

|                         | interaction   | $\rho$ | $\nabla^2\rho$ | $\epsilon$ | H      |
|-------------------------|---------------|--------|----------------|------------|--------|
| $(HCN)_2 \cdots ZF_3$   |               |        |                |            |        |
| $(HCN)_2 \cdots PF_3$   | N $\cdots$ P  | 0.011  | +0.031         | 0.049      | +0.001 |
| $(HCN)_2 \cdots AsF_3$  | N $\cdots$ As | 0.014  | +0.038         | 0.042      | +0.001 |
| $(HCN)_2 \cdots SbF_3$  | N $\cdots$ Sb | 0.017  | +0.042         | 0.055      | +0.000 |
| $(HCN)_2 \cdots BiF_3$  | N $\cdots$ Bi | 0.020  | +0.057         | 0.047      | +0.000 |
| $(H_3N)_2 \cdots ZF_3$  |               |        |                |            |        |
| $(H_3N)_2 \cdots PF_3$  | N $\cdots$ P  | 0.017  | +0.041         | 0.058      | 0.0002 |
| $(H_3N)_2 \cdots AsF_3$ | N $\cdots$ As | 0.025  | +0.051         | 0.053      | -0.001 |
| $(H_3N)_2 \cdots SbF_3$ | N $\cdots$ Sb | 0.030  | +0.067         | 0.072      | -0.002 |
| $(H_3N)_2 \cdots BiF_3$ | N $\cdots$ Bi | 0.030  | +0.084         | 0.040      | -0.001 |
|                         | F $\cdots$ N  | 0.014  | +0.063         | 10.820     | 0.001  |
| $(NC^-)_2 \cdots ZF_3$  |               |        |                |            |        |
| $(NC^-)_2 \cdots SbF_3$ | N $\cdots$ Sb | 0.047  | +0.071         | 0.067      | +0.009 |
| $(NC^-)_2 \cdots BiF_3$ | N $\cdots$ Bi | 0.037  | +0.074         | 0.034      | +0.003 |

Table S9.  $V_{s,\max}$  of trimers calculated at the MP2/aug-cc-pVDZ level of theory.

| Isolated molecule         | $V_{s,\max}$<br>(Z-F) $\sigma$ -hole | $V_{s,\max}$<br>$\pi$ -hole |
|---------------------------|--------------------------------------|-----------------------------|
| (HCN) $_2$ ⋯ZF $_3$       |                                      |                             |
| (HCN) $_2$ ⋯PF $_3$       | 14.2                                 | -11.6                       |
| (HCN) $_2$ ⋯AsF $_3$      | 20.3                                 | -16.5                       |
| (HCN) $_2$ ⋯SbF $_3$      | 25.8                                 | -17.3                       |
| (HCN) $_2$ ⋯BiF $_3$      | 27.7                                 | -15.2                       |
| (H $_3$ N) $_2$ ⋯ZF $_3$  |                                      |                             |
| (NH $_3$ ) $_2$ ⋯PF $_3$  | 13.2                                 | -12.9                       |
| (NH $_3$ ) $_2$ ⋯AsF $_3$ | 16.1                                 | -21.3                       |
| (NH $_3$ ) $_2$ ⋯SbF $_3$ | 16.1                                 | -24.9                       |
| (NH $_3$ ) $_2$ ⋯BiF $_3$ | 34.6                                 | -21.7                       |
| (NC $^-$ ) $_2$ ⋯ZF $_3$  |                                      |                             |
| (CN) $_2$ ⋯SbF $_3$       | -147.3                               | -195.6                      |
| (CN) $_2$ ⋯BiF $_3$       | -119.7                               | -178.7                      |

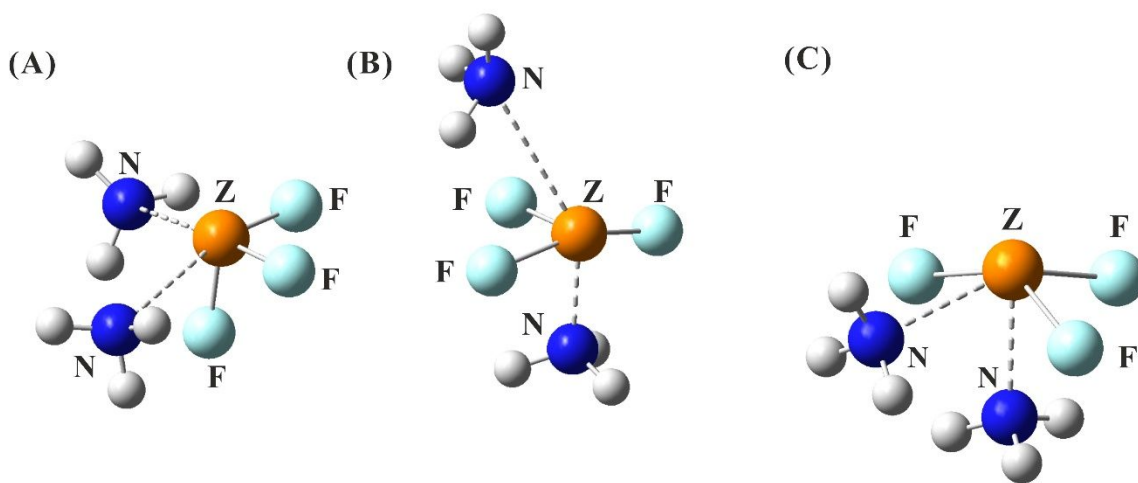

Fig S2. Three minima located on the potential energy surface of (NH $_3$ ) $_2$ ⋯ZF $_3$ .

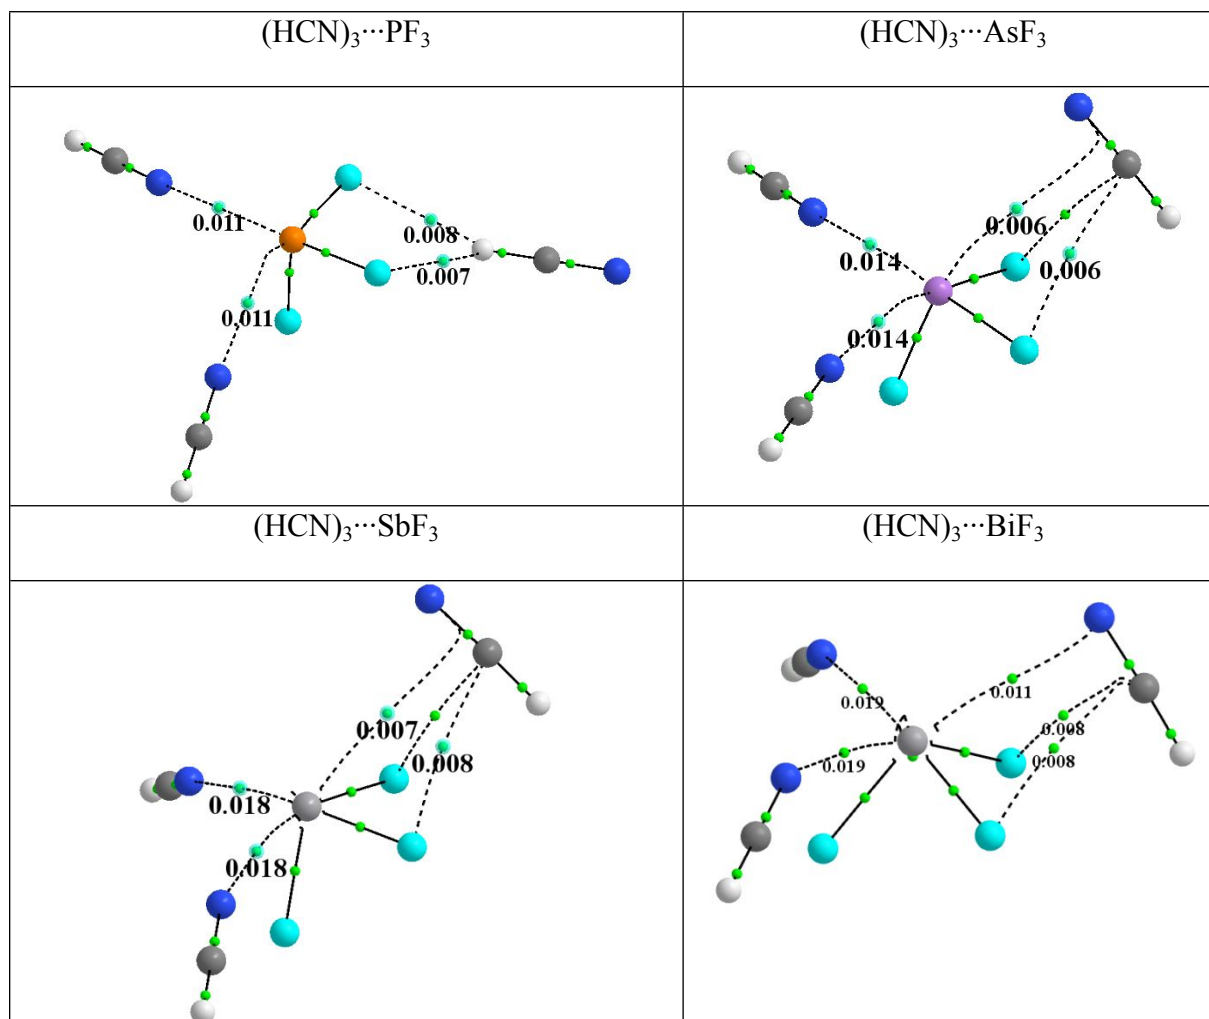

Fig S3. AIM molecular diagrams of MP2/aug-cc-pVDZ optimized structures of (HCN)<sub>3</sub>⋯ZF<sub>3</sub>. Green dots represent bond critical points. Numbers refers to electron densities at BCPs (in a.u.)



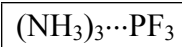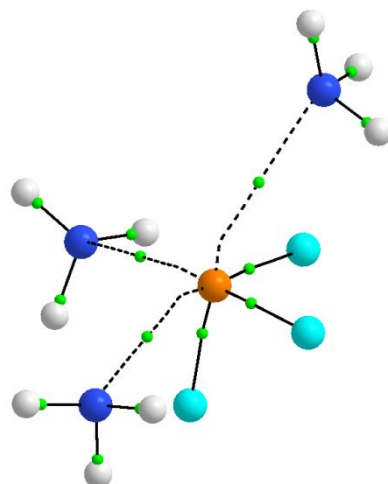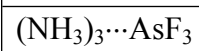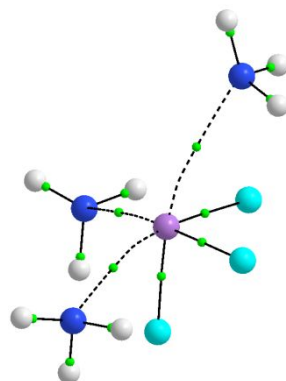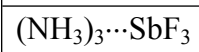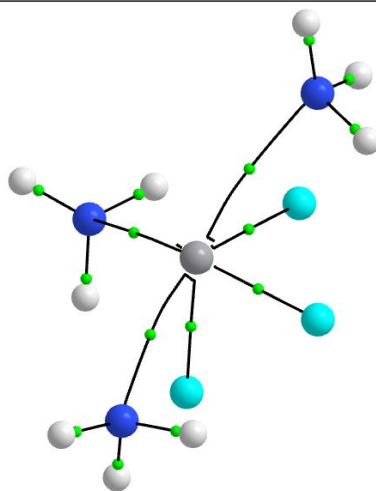

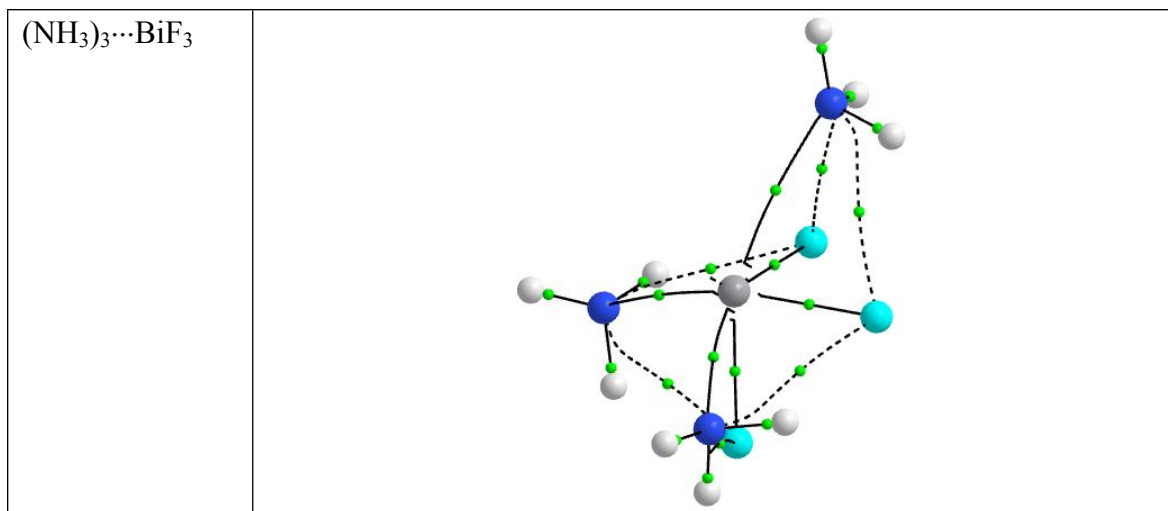

Fig S4. AIM molecular diagrams of MP2/aug-cc-pVDZ optimized structures of (H<sub>3</sub>N)<sub>3</sub>⋯ZF<sub>3</sub>. Green dots represent bond critical points.

Table S10. AIM descriptors of the tetramers containing ZF<sub>3</sub> and 3 NH<sub>3</sub> molecules. Bond critical point (BCP) properties: electron density  $\rho$ , Laplacian of electron density  $\nabla^2\rho$ , ellipticity  $\varepsilon$ , and total electron energy H, were obtained at the MP2/ aug-cc-pVDZ level. Data in atomic units.

|                                                   | interaction | $\rho$ | $\nabla^2\rho$ | $\varepsilon$ | H       |
|---------------------------------------------------|-------------|--------|----------------|---------------|---------|
| (NH <sub>3</sub> ) <sub>3</sub> ⋯PF <sub>3</sub>  | N⋯P         | 0.015  | +0.038         | 0.050         | +0.0004 |
| (NH <sub>3</sub> ) <sub>3</sub> ⋯AsF <sub>3</sub> | N⋯As        | 0.021  | +0.046         | 0.035         | -0.0006 |
| (NH <sub>3</sub> ) <sub>3</sub> ⋯SbF <sub>3</sub> | N⋯Sb        | 0.026  | +0.053         | 0.051         | -0.002  |
| (NH <sub>3</sub> ) <sub>3</sub> ⋯BiF <sub>3</sub> | N⋯Bi        | 0.027  | +0.075         | 0.036         | -0.001  |

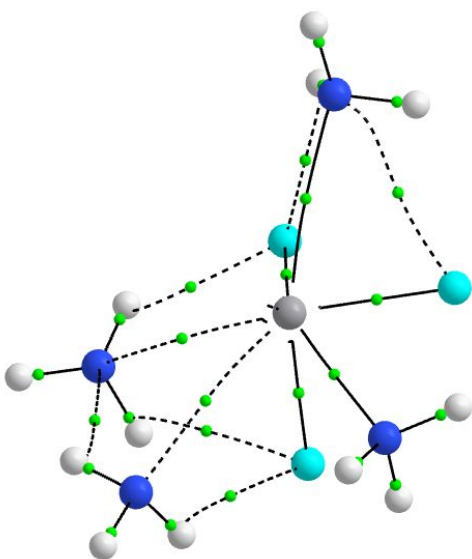

Fig S5. AIM molecular diagram of (NH<sub>3</sub>)<sub>4</sub>⋯BiF<sub>3</sub>.

Fig S6. Crystal structures of tetra and penta-coordinated Z (Z=P, As, Sb) atoms in complexes with various organic ligands acquired from CSD.

|                                                                                     |                                                                                          |
|-------------------------------------------------------------------------------------|------------------------------------------------------------------------------------------|
| 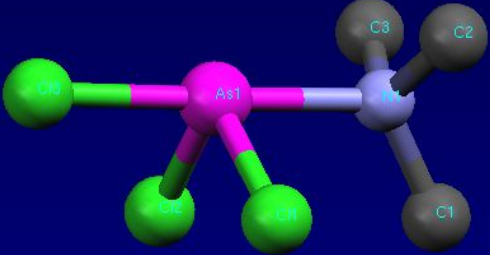   | <p>ASCTMA <sup>[82]</sup><br/> <math>R(N\cdots As) = 2.287 \text{ \AA}</math></p>        |
|    | <p>MEWXOB <sup>[83]</sup><br/> <math>R(N\cdots P) = 1.978 \text{ \AA}</math></p>         |
|  | <p>SAVFAX <sup>[84]</sup><br/> <math>R(N\cdots Sb) = 2.596 \text{ \AA}</math></p>        |
|  | <p>RIFLOJ <sup>[85]</sup><br/> <math>R(N\cdots Sb) = 2.171, 2.375 \text{ \AA}</math></p> |

|                                                                                     |  |                                                                                          |
|-------------------------------------------------------------------------------------|--|------------------------------------------------------------------------------------------|
| 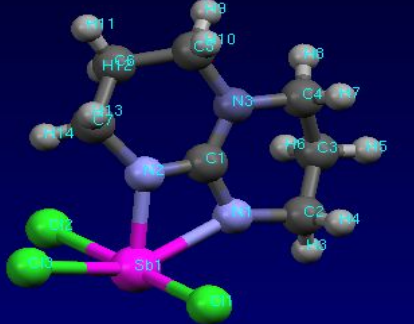   |  | <p>TANVUB <sup>[86]</sup><br/> <math>R(N\cdots Sb) = 2.076, 2.260 \text{ \AA}</math></p> |
|   |  | <p>XEXDEJ <sup>[87]</sup><br/> <math>R(N\cdots P) = 1.650, 1.783 \text{ \AA}</math></p>  |
|  |  | <p>YUXPUC <sup>[88]</sup><br/> <math>R(N\cdots Sb) = 2.470, 2.470 \text{ \AA}</math></p> |
|  |  | <p>ZARMEN <sup>[89]</sup><br/> <math>R(N\cdots Sb) = 2.465, 2.484 \text{ \AA}</math></p> |
